# Supplementary material
Source: PubMed Central journal article supplement (PMC3807375)
Supplement: JVI.01197-13_zjv999098122so1.pdf [file JVI.01197-13_zjv999098122so1.pdf]

## SUPPLEMENTAL FIGURES

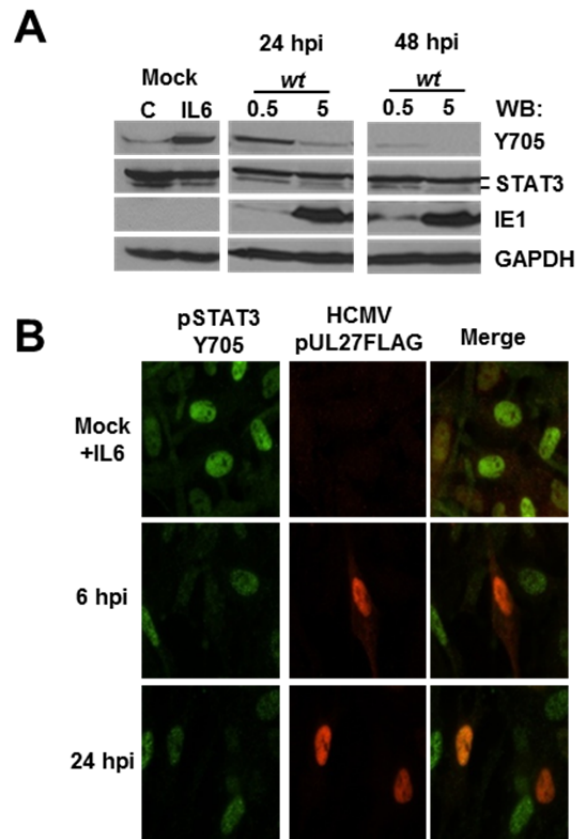

**Figure S1. Change in STAT3 phosphorylation is MOI-dependent.**

(A) U373 cells were infected at either 0.5 IU/cell or 5 IU/cell with AD $wt$  for 24 and 48 h. Mock-infected cells were treated with or without IL-6 for 15 min. Western blot analysis was completed using the indicated antibodies. The STAT3 $\alpha$  and  $\beta$  isoforms are indicated. (B) U373 cells were infected at 0.5 IU/cell using AD $wt$  virus and processed for immunofluorescence analysis using anti-pSTAT3 (Y705) (green) and anti-FLAG (red) antibodies.

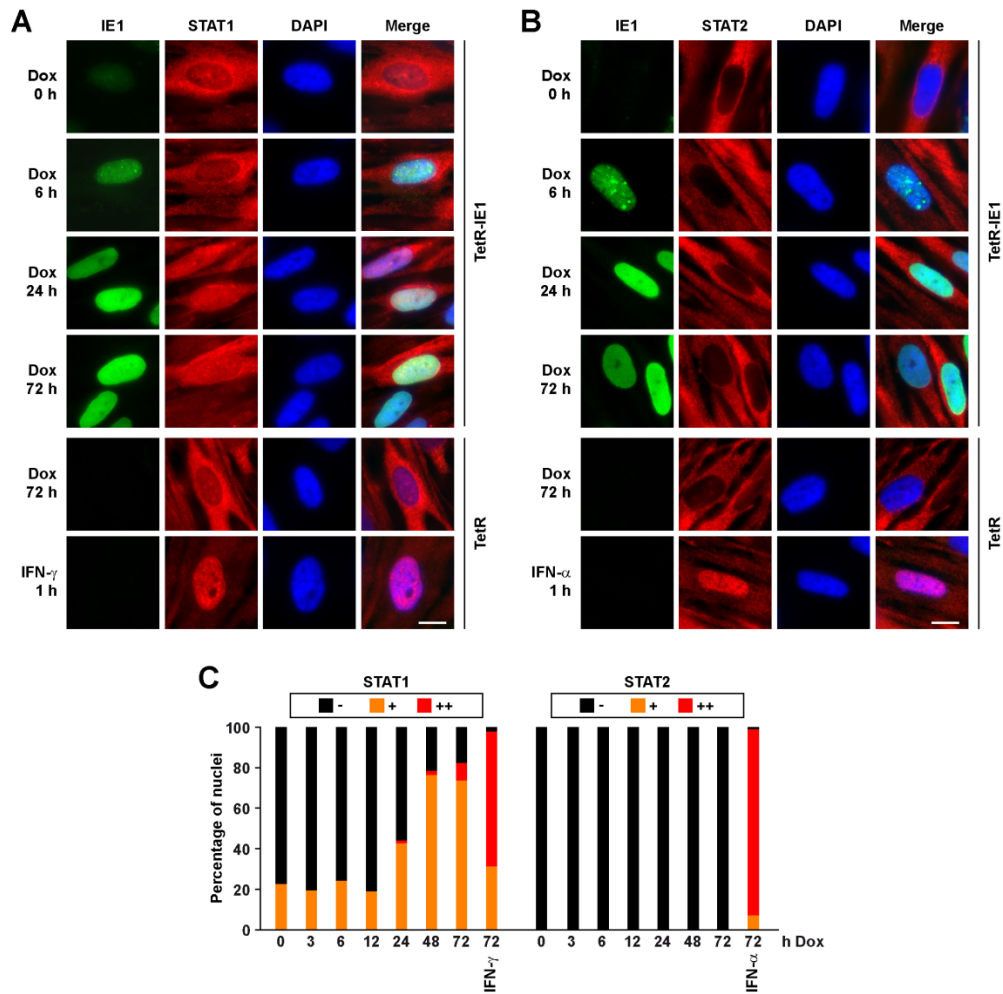

**Figure S2. Subcellular localization of STAT1 and STAT2 in IE1-expressing cells.**

(A) TetR-IE1 and TetR cells were treated with doxycycline (Dox) or interferon gamma (IFN- $\gamma$ ) for the indicated times. Samples were fixed with methanol and processed for immunofluorescence analysis using anti-IE1 (green) and anti-STAT1 (red) antibodies, and the DNA stain DAPI (blue). Scale bar, 10  $\mu$ m. (B) TetR-IE1 and TetR cells were treated with doxycycline (Dox) or interferon alpha (IFN- $\alpha$ ) for the indicated times. Samples were fixed with methanol and processed for immunofluorescence analysis using anti-IE1 (green) and anti-STAT2 (red) antibodies, and the DNA stain DAPI (blue). Scale bar, 10  $\mu$ m. (C) The percentage of positive cell nuclei was determined from 100 randomly selected cells per sample (STAT1/2 -, STAT1/2 staining mostly cytoplasmic; STAT1/2 +, STAT1/2 staining cytoplasmic and nuclear; STAT1/2 ++, STAT1/2 staining mostly nuclear).

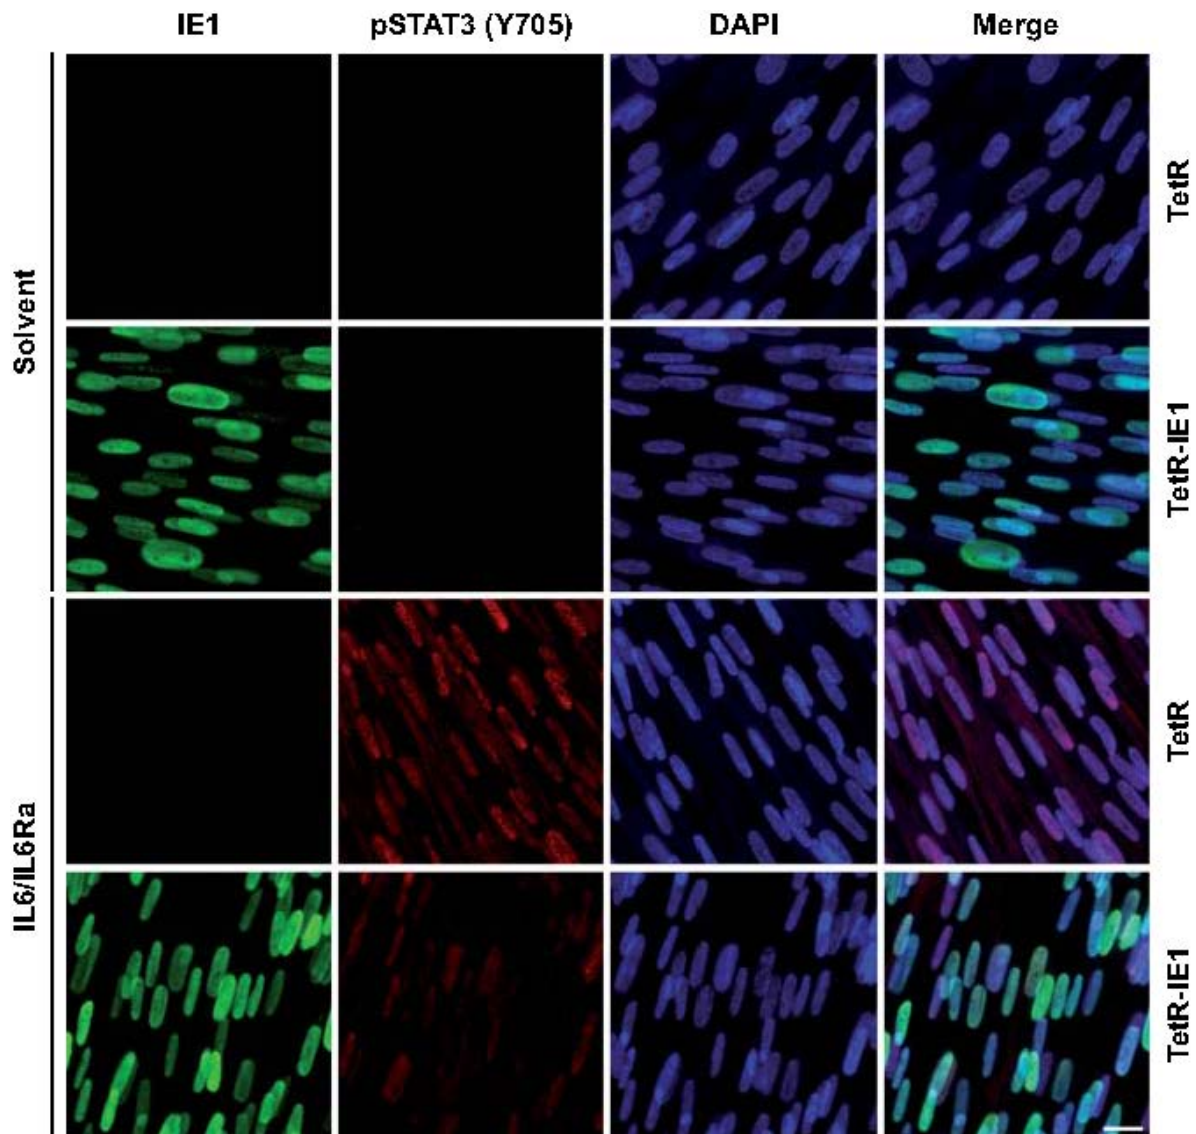

**Figure S3. IE1 is sufficient to disrupt tyrosine phosphorylation of nuclear STAT3.**

TetR and TetR-IE1 cells were treated with Dox for 72 h and with IL6 and IL6R $\alpha$  or solvent for 15 min. Samples were fixed, incubated with antibodies against IE1 (green) and pSTAT3 at Y705 (red), and counterstained for DNA using DAPI (blue). Scale bar, 20  $\mu$ m.
